# Supplementary material
Source: Springer Nature journal article supplement (https://www.springermedizin.de/resource/supplementary/12936_2011_1946_MOESM13_ESM.pdf/9542110)
Supplement: MOESM13 [file 9542110]

Astrinate 100 mg

**Artesunate**

**AT17**

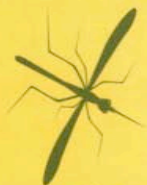

6 tablets  
100 mg per tablet  
For the curative  
treatment of malaria

Lot: 110705 Exp: 06/08  
Mfg: 07/05

7

MANUFACTURED FOR AT17 RUE POISSONNIERS 75018 PARIS

451EU  
04

Astrinate 100 mg

**Artesunate**

**AT17**

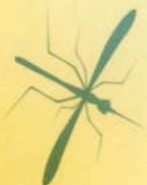

6 comprimés  
100 mg par comprimé  
Antipaludéen curatif

MANUFACTURED FOR AT17 RUE POISSONNIERS 75018 PARIS
